# Supplementary material for: Estimation of soil erosion considering soil loss tolerance in karst area
Source: Copernicus journal article supplement (doi:10.5194/nhess-2018-310), 2018-10-30
Supplement: Supplementary file [file nhess-2018-310-AC2-supplement.pdf]

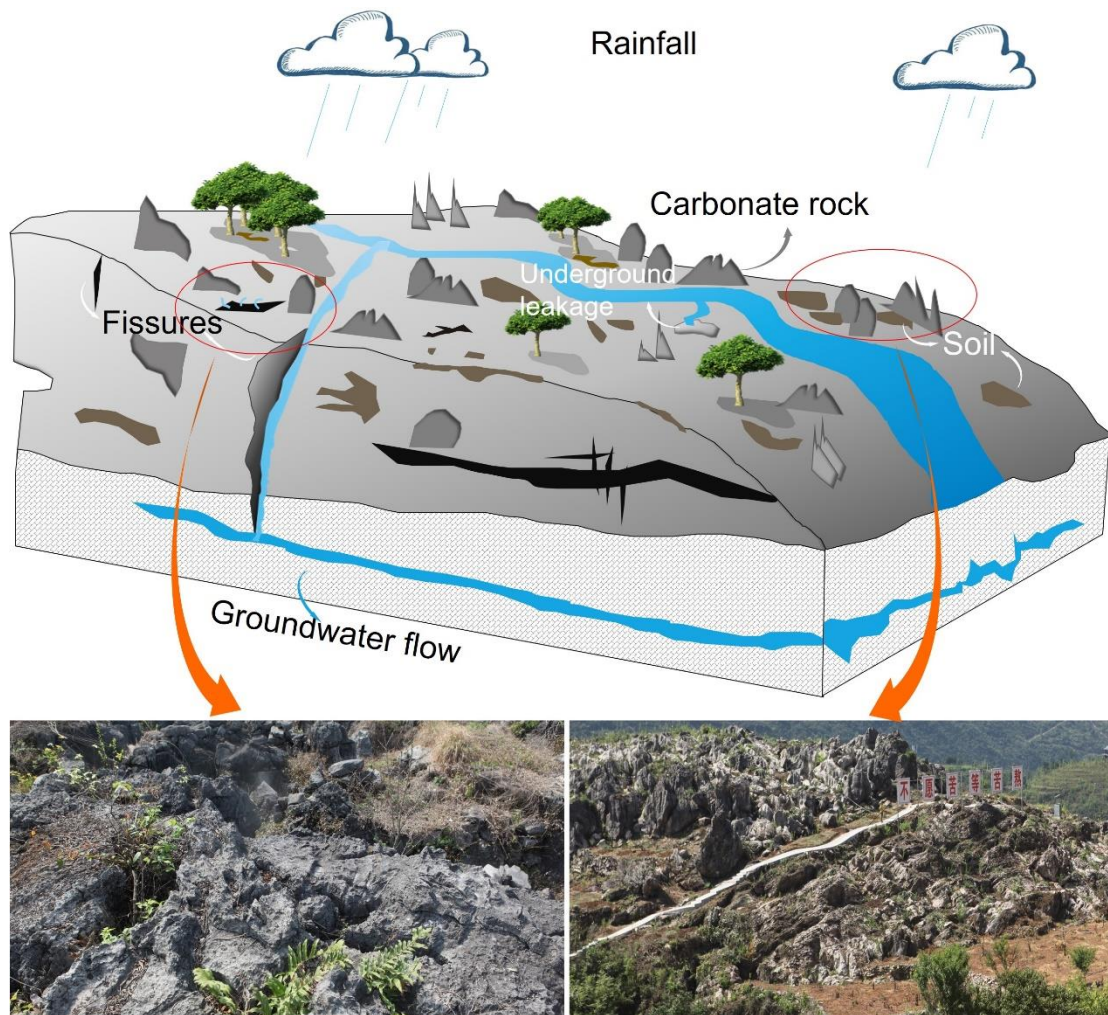

Fig. 2. The geomorphologic model and actual situation of karst area
